# Supplementary material
Source: HighWire-hosted journal article supplement (https://ard.bmj.com/content/annrheumdis-2021-219884)
Supplement: inline-supplementary-material-2 [file inline-supplementary-material-2.xlsx]

## Sheet: SuppTable1
Supplementary Table 1. Summary of the datasets included in the study
	GWAS Study	Genotyping platform (case / control)	N (case / control) - After genotyping QC steps	NFINAL (case / control)	No. variants after imputation and QC	Reference for case/control data (PMID)
Previous SSc GWAS cohorts	Spain 1	Illumina HumanCNV370K / Illumina HumanCNV370K	376/388	361/355	8274	20383147 / 20383147
	Germany 1	Illumina HumanCNV370K / Illumina HumanHap550k	280/667	257/659	8039	20383147 / 20383147
	The Netherlands 1	Illumina HumanCNV370K/ Illumina HumanHap550k	201/638	183/626	8019	20383147 / 20383147
	USA 1	Illumina HumanHap550K / Breast cancer controls CGEMS; prostate cancer controls CGEMS; Illumina iControlDB database	1,491/3,485	1,365/3,219	8105	20383147 / 20383147
	France	Illumina Human610-Quad BeadChip	564/488	541/470	8143	21750679 / 21750679
New SSc GWAS cohorts	Spain 2	Illumina HumanCore; HumanCytoSNP-12v2 / Illumina HumanCore	1,293/1,324	1,169/1,262	8277	31672989 / 28041642
	Germany 2	Illumina HumanCore / Illumina HumanOmniExpressExome 8v1.2.	404/1,149	364/1,133	8056	31672989 / 28973304
	The Netherlands 2	Illumina HumanCore / Illumina HumanHap550k	541/846	449/812	8000	31672989 / 20190752
	USA 2	Illumina HumanCore / HumanHap300v1.1	1,430/1,580	1,286/1,388	8112	31672989 / 18204446
	Italy	Illumina HumanCore / Illumina HumanHap550k	1,018/960	998/952	8282	31672989 / 26502338; 20190752
	UK	Illumina HumanCore / Affymetrix GeneChip 500K Mapping Array	1,162/2,978	1,094/2,936	8006	31672989 / 17554300
	Sweden	Illumina HumanCore / Illumina HumanHap300k	192/1,079	170/1,029	8001	31672989 / 20453842
	Norway	Illumina HumanCore / Illumina HumanHap550K	102/121	96/118	7769	31672989 / 23055271
	Australia/UK	Illumina OmniExpress / Affymetrix v6	792/2,630	762/2,625	8005	31672989 / WTCCC2
META-ANALYSIS			9,846/18,333	9,095/17,584	8,3381
CGEMS, Cancer Genetic Markers of Susceptibility studies; QC,quality control; SSc, systemic sclerosis.
1Total number of variants included in the meta-analysis.

## Sheet: SuppTable2
Supplementary Table 2. Linkage disequilibrium assessment (r2) among the independently associated variants in the global analysis.
	HLA_B_0801	rs2844532	rs3094228	rs9268515	AA_DRB1_Ile67	AA_DRB1_Tyr60	AA_DRB1_Ala58	HLA_DRB1_1104	HLA_DRB1_1301	rs482044	HLA_DQA1_0401	AA_DQA1_Thr69	rs1142338●	rs1048372●	HLA_DQB1_0202	HLA_DQB1_0501	rs17500468	rs1126511●	AA_DPB1_Leu11	AA_DPB1_Ile76	HLA_DPB1_0301	HLA_DPB1_0601	HLA_DPB1_1301	rs9469378
HLA_B_0801	1	0.0331315	0.467833	0.00979016	0.0453192	0.0174306	0.0156735	0.00822446	0.00230334	0.0397602	0.00195539	0.00215598	0.00195539	0.0340388	0.00904217	0.0101119	0.012709	0.00381038	0.00381038	0.00157633	7.67641e-05	0.000674335	0.0019651	0.00159217
rs2844532	0.0331315	1	0.0113248	0.00367173	0.00685018	0.0202601	0.000365541	0.00260497	0.000837508	0.0309219	0.00174365	0.0019988	0.00174365	0.00644071	0.063061	0.00489053	0.00350892	0.00329622	0.00329622	0.000590089	5.2979e-07	5.61537e-07	0.00010972	8.11967e-05
rs3094228	0.467833	0.0113248	1	0.00668482	0.0498742	0.0233291	0.0114888	0.0495768	0.00433953	0.0525122	0.00264329	0.00282592	0.00264329	0.0443571	0.0150286	0.0177691	0.000303992	0.00320108	0.00320108	0.000220493	0.000398053	0.00166744	0.000142558	1.68145e-05
rs9268515	0.00979016	0.00367173	0.00668482	1	0.0727326	0.0291755	0.00128292	0.0102715	0.00281042	0.210089	0.00672585	0.00726718	0.00672585	0.0577639	0.0155849	0.0239723	4.08348e-05	3.96417e-06	3.96417e-06	0.000207298	3.66667e-05	0.0282182	0.00235467	0.00291351
AA_DRB1_Ile67	0.0453192	0.00685018	0.0498742	0.0727326	1	0.12526	0.0600729	0.0273681	0.0873764	0.0291172	0.0215222	0.0179128	0.0215222	0.699014	0.143024	0.0688665	0.0488779	0.00133905	0.00133905	0.00691519	0.000623766	0.00643596	0.00477906	0.0100028
AA_DRB1_Tyr60	0.0174306	0.0202601	0.0233291	0.0291755	0.12526	1	0.0233687	0.00837896	0.0127476	0.192183	0.0086364	0.00866838	0.0086364	0.09429	0.45519	0.0292133	0.0229526	0.0105177	0.0105177	0.00402911	0.00169647	0.00160138	0.00642468	0.00136519
AA_DRB1_Ala58	0.0156735	0.000365541	0.0114888	0.00128292	0.0600729	0.0233687	1	0.381682	0.00782343	0.0816622	0.00325819	0.00330051	0.00325819	0.0618574	0.010726	0.0193913	0.12551	0.002844	0.002844	0.000171166	0.00172211	0.00152084	0.00037408	0.000186872
HLA_DRB1_1104	0.00822446	0.00260497	0.0495768	0.0102715	0.0273681	0.00837896	0.381682	1	0.00314248	0.0298362	0.00113256	0.00116047	0.00113256	0.0224906	0.00336215	0.00757718	0.107213	0.00151957	0.00151957	0.000219196	0.00140842	0.000914553	0.00039135	0.000187019
HLA_DRB1_1301	0.00230334	0.000837508	0.00433953	0.00281042	0.0873764	0.0127476	0.00782343	0.00314248	1	0.0875595	0.00224563	0.00258282	0.00224563	0.0976856	0.0054703	0.00972819	6.31681e-05	3.60292e-07	3.60292e-07	0.00235735	0.000129657	0.000748738	0.000305134	0.000559251
rs482044	0.0397602	0.0309219	0.0525122	0.210089	0.0291172	0.192183	0.0816622	0.0298362	0.0875595	1	0.0249086	0.0268414	0.0249086	0.0195133	0.149098	0.0540147	0.0345386	0.0133169	0.0133169	0.00252489	6.66171e-06	0.00983176	0.00147631	5.54357e-05
HLA_DQA1_0401	0.00195539	0.00174365	0.00264329	0.00672585	0.0215222	0.0086364	0.00325819	0.00113256	0.00224563	0.0249086	1	0.928627	1	0.018614	0.0043209	0.00536321	0.00214215	0.00221213	0.00221213	0.00022857	0.0093359	1.58067e-05	0.000205016	0.00056707
AA_DQA1_Thr69	0.00215598	0.0019988	0.00282592	0.00726718	0.0179128	0.00866838	0.00330051	0.00116047	0.00258282	0.0268414	0.928627	1	0.928627	0.021284	0.00477955	0.00550041	0.00186064	0.00227401	0.00227401	0.000201682	0.00943998	3.62851e-05	0.000171575	0.00057877
rs1142338●	0.00195539	0.00174365	0.00264329	0.00672585	0.0215222	0.0086364	0.00325819	0.00113256	0.00224563	0.0249086	1	0.928627	1	0.018614	0.0043209	0.00536321	0.00214215	0.00221213	0.00221213	0.00022857	0.0093359	1.58067e-05	0.000205016	0.00056707
rs1048372●	0.0340388	0.00644071	0.0443571	0.0577639	0.699014	0.09429	0.0618574	0.0224906	0.0976856	0.0195133	0.018614	0.021284	0.018614	1	0.167955	0.0891229	0.0412389	0.00321322	0.00321322	0.00588925	0.000330107	0.00572087	0.00319231	0.00793001
HLA_DQB1_0202	0.00904217	0.063061	0.0150286	0.0155849	0.143024	0.45519	0.010726	0.00336215	0.0054703	0.149098	0.0043209	0.00477955	0.0043209	0.167955	1	0.0141064	0.01273	0.0166116	0.0166116	0.000252169	0.000667282	0.00135831	0.000140004	0.000748064
HLA_DQB1_0501	0.0101119	0.00489053	0.0177691	0.0239723	0.0688665	0.0292133	0.0193913	0.00757718	0.00972819	0.0540147	0.00536321	0.00550041	0.00536321	0.0891229	0.0141064	1	0.0725927	8.00502e-06	8.00502e-06	0.000491733	6.26143e-05	0.000171767	0.00015189	0.00107519
rs17500468	0.012709	0.00350892	0.000303992	4.08348e-05	0.0488779	0.0229526	0.12551	0.107213	6.31681e-05	0.0345386	0.00214215	0.00186064	0.00214215	0.0412389	0.01273	0.0725927	1	0.000558812	0.000558812	0.00192591	0.000586439	0.00189316	0.00101508	0.000782475
rs1126511●	0.00381038	0.00329622	0.00320108	3.96417e-06	0.00133905	0.0105177	0.002844	0.00151957	3.60292e-07	0.0133169	0.00221213	0.00227401	0.00221213	0.00321322	0.0166116	8.00502e-06	0.000558812	1	1	0.0652302	0.404788	0.0625471	0.0891536	0.0109975
AA_DPB1_Leu11	0.00381038	0.00329622	0.00320108	3.96417e-06	0.00133905	0.0105177	0.002844	0.00151957	3.60292e-07	0.0133169	0.00221213	0.00227401	0.00221213	0.00321322	0.0166116	8.00502e-06	0.000558812	1	1	0.0652302	0.404788	0.0625471	0.0891536	0.0109975
AA_DPB1_Ile76	0.00157633	0.000590089	0.000220493	0.000207298	0.00691519	0.00402911	0.000171166	0.000219196	0.00235735	0.00252489	0.00022857	0.000201682	0.00022857	0.00588925	0.000252169	0.000491733	0.00192591	0.0652302	0.0652302	1	0.00345717	1.14621e-07	0.815821	0.219776
HLA_DPB1_0301	7.67641e-05	5.2979e-07	0.000398053	3.66667e-05	0.000623766	0.00169647	0.00172211	0.00140842	0.000129657	6.66171e-06	0.0093359	0.00943998	0.0093359	0.000330107	0.000667282	6.26143e-05	0.000586439	0.404788	0.404788	0.00345717	1	0.00231966	0.00288327	0.00430247
HLA_DPB1_0601	0.000674335	5.61537e-07	0.00166744	0.0282182	0.00643596	0.00160138	0.00152084	0.000914553	0.000748738	0.00983176	1.58067e-05	3.62851e-05	1.58067e-05	0.00572087	0.00135831	0.000171767	0.00189316	0.0625471	0.0625471	1.14621e-07	0.00231966	1	2.21282e-05	0.000288012
HLA_DPB1_1301	0.0019651	0.00010972	0.000142558	0.00235467	0.00477906	0.00642468	0.00037408	0.00039135	0.000305134	0.00147631	0.000205016	0.000171575	0.000205016	0.00319231	0.000140004	0.00015189	0.00101508	0.0891536	0.0891536	0.815821	0.00288327	2.21282e-05	1	0.274474
rs9469378	0.00159217	8.11967e-05	1.68145e-05	0.00291351	0.0100028	0.00136519	0.000186872	0.000187019	0.000559251	5.54357e-05	0.00056707	0.00057877	0.00056707	0.00793001	0.000748064	0.00107519	0.000782475	0.0109975	0.0109975	0.219776	0.00430247	0.000288012	0.274474	1
In boldface the variants without other variants in LD; AA: amino acids
●Coding single nucleotide polymorphisms

## Sheet: SuppTable3
Supplementary Table 3. Colocalization results for any SNP-eGENE-Tissue combination
Gene Name	Adipose_Subcutaneous	Adipose_Visceral_Omentum	Adrenal_Gland	Artery_Aorta	Artery_Coronary	Artery_Tibial	Brain_Amygdala	Brain_Anterior_cingulate_cortex_BA24	Brain_Caudate_basal_ganglia	Brain_Cerebellar_Hemisphere	Brain_Cerebellum	Brain_Cortex	Brain_Frontal_Cortex_BA9	Brain_Hippocampus	Brain_Hypothalamus	Brain_Nucleus_accumbens_basal_ganglia	Brain_Putamen_basal_ganglia	Brain_Spinal_cord_cervical_c-1	Brain_Substantia_nigra	Breast_Mammary_Tissue	Cells_Cultured_fibroblasts	Cells_EBV-transformed_lymphocytes	Colon_Sigmoid	Colon_Transverse	Esophagus_Gastroesophageal_Junction	Esophagus_Mucosa	Esophagus_Muscularis	Heart_Atrial_Appendage	Heart_Left_Ventricle	Kidney_Cortex	Liver	Lung	Minor_Salivary_Gland	Muscle_Skeletal	Nerve_Tibial	Ovary	Pancreas	Pituitary	Prostate	Skin_Not_Sun_Exposed_Suprapubic	Skin_Sun_Exposed_Lower_leg	Small_Intestine_Terminal_Ileum	Spleen	Stomach	Testis	Thyroid	Uterus	Vagina	Whole_Blood
HLA-G	NA	NA	NA	NA	NA	NA	NA	NA	chr6 30769726 30769727	NA	NA	NA	NA	NA	NA	NA	NA	NA	NA	NA	NA	NA	NA	NA	NA	NA	NA	NA	NA	NA	NA	NA	NA	NA	NA	NA	NA	NA	NA	NA	NA	NA	chr6 30365320 30365321	NA	NA	chr6 30769726 30769727	NA	NA	NA
HLA-H	NA	NA	NA	NA	NA	NA	NA	NA	chr6 30769726 30769727	NA	NA	NA	NA	NA	NA	NA	NA	NA	NA	NA	NA	NA	NA	NA	NA	NA	NA	NA	NA	NA	NA	NA	NA	NA	NA	NA	NA	NA	NA	NA	NA	NA	NA	NA	NA	chr6 30769726 30769727	NA	NA	NA
HCG4P7	NA	NA	NA	NA	NA	NA	NA	NA	NA	NA	NA	NA	NA	NA	NA	NA	NA	NA	NA	NA	NA	NA	NA	NA	NA	NA	NA	NA	NA	NA	NA	NA	NA	NA	NA	NA	NA	NA	NA	NA	NA	NA	chr6 30365320 30365321	NA	NA	NA	NA	NA	NA
AL662795.2	NA	NA	NA	NA	NA	NA	NA	NA	NA	NA	NA	NA	NA	chr6 31082285 31082286	chr6 31082285 31082286	NA	NA	chr6 31082285 31082286	NA	NA	NA	NA	NA	NA	NA	NA	NA	NA	NA	NA	NA	NA	NA	NA	NA	NA	NA	NA	NA	NA	NA	NA	chr6 31082285 31082286	NA	NA	NA	NA	NA	NA
HLA-K	NA	NA	NA	NA	NA	NA	NA	NA	NA	NA	NA	NA	NA	NA	NA	NA	NA	NA	NA	NA	NA	NA	NA	NA	NA	NA	NA	NA	NA	NA	NA	NA	NA	NA	NA	NA	NA	NA	NA	NA	NA	NA	NA	NA	NA	chr6 30769726 30769727	NA	NA	NA
HLA-V	NA	NA	NA	NA	NA	NA	NA	NA	NA	NA	NA	NA	NA	NA	NA	NA	NA	NA	NA	NA	NA	NA	NA	NA	NA	NA	NA	NA	NA	NA	NA	NA	NA	NA	NA	NA	NA	NA	NA	NA	NA	NA	chr6 30365320 30365321	NA	NA	NA	NA	NA	NA
RNF39	NA	NA	NA	NA	NA	NA	NA	NA	NA	NA	NA	NA	NA	NA	NA	NA	NA	NA	NA	NA	NA	NA	NA	NA	NA	NA	NA	NA	NA	NA	NA	NA	NA	NA	NA	NA	NA	NA	NA	NA	NA	NA	chr6 30365320 30365321	NA	NA	NA	NA	NA	NA
HCG9	NA	NA	NA	NA	NA	NA	NA	NA	NA	NA	NA	NA	NA	NA	NA	NA	NA	NA	NA	NA	NA	NA	NA	NA	NA	NA	NA	NA	NA	NA	NA	NA	NA	NA	NA	NA	NA	NA	NA	NA	NA	NA	chr6 30365320 30365321	NA	NA	NA	NA	NA	NA
ZFP57	NA	NA	NA	NA	NA	NA	NA	NA	NA	NA	NA	NA	NA	NA	NA	NA	NA	NA	NA	NA	NA	NA	NA	NA	NA	NA	NA	NA	NA	NA	NA	NA	NA	NA	NA	NA	NA	NA	NA	NA	NA	NA	chr6 30365320 30365321	NA	NA	NA	NA	NA	NA
HCP5B	NA	NA	NA	NA	NA	NA	NA	NA	chr6 30769726 30769727	NA	NA	NA	NA	NA	NA	NA	NA	NA	NA	NA	NA	NA	NA	NA	NA	NA	NA	NA	NA	NA	NA	NA	NA	NA	NA	NA	NA	NA	NA	NA	NA	NA	NA	NA	NA	chr6 30769726 30769727	NA	NA	NA
GABBR1	NA	NA	NA	NA	NA	NA	NA	NA	NA	NA	NA	NA	NA	NA	NA	NA	NA	NA	NA	NA	NA	NA	NA	NA	NA	NA	NA	NA	NA	NA	NA	NA	NA	NA	NA	NA	NA	NA	NA	NA	NA	NA	chr6 30365320 30365321	NA	NA	NA	NA	NA	NA
ZNF311	chr6 29542947 29542948	NA	NA	NA	NA	NA	NA	NA	NA	NA	NA	NA	NA	NA	NA	NA	NA	NA	NA	NA	NA	NA	NA	NA	NA	NA	NA	NA	NA	NA	NA	NA	NA	NA	NA	NA	NA	NA	NA	NA	NA	NA	NA	NA	NA	NA	NA	NA	chr6 29951011 29951012
HLA-F-AS1	NA	NA	NA	NA	NA	NA	NA	NA	NA	NA	NA	NA	NA	NA	NA	NA	NA	NA	NA	NA	NA	NA	NA	NA	NA	NA	NA	NA	NA	NA	NA	NA	NA	NA	NA	NA	NA	NA	NA	NA	NA	NA	chr6 30365320 30365321	NA	NA	NA	NA	NA	NA
HCG4B	NA	NA	NA	NA	NA	NA	NA	NA	NA	NA	NA	NA	NA	NA	NA	NA	NA	NA	NA	NA	NA	NA	NA	NA	NA	NA	NA	NA	NA	NA	NA	NA	NA	NA	NA	NA	NA	NA	NA	NA	NA	NA	chr6 30365320 30365321	NA	NA	NA	NA	NA	NA
HLA-U	chr6 30900094 30900095	NA	NA	NA	NA	chr6 30900094 30900095	NA	NA	NA	NA	NA	NA	NA	NA	NA	NA	NA	NA	NA	NA	NA	NA	NA	chr6 30900094 30900095	chr6 30900094 30900095	NA	NA	NA	chr6 30900094 30900095	NA	NA	NA	NA	chr6 30900094 30900095	chr6 30900094 30900095	NA	chr6 30900094 30900095	NA	NA	NA	NA	chr6 30900094 30900095	chr6 30900094 30900095	NA	NA	NA	NA	NA	chr6 30900094 30900095
MICD	NA	NA	NA	NA	NA	chr6 30900094 30900095	NA	NA	NA	NA	NA	chr6 30900094 30900095	NA	NA	NA	NA	NA	NA	NA	NA	NA	NA	NA	chr6 30900094 30900095	chr6 30900094 30900095	NA	NA	chr6 30900094 30900095	chr6 30900094 30900095	NA	NA	NA	chr6 30900094 30900095	chr6 30900094 30900095	chr6 30900094 30900095	NA	chr6 30900094 30900095	NA	NA	chr6 30900094 30900095	chr6 30900094 30900095	chr6 30900094 30900095	chr6 30900094 30900095	NA	NA	NA	NA	NA	chr6 30900094 30900095
SCAND3	chr6 29542947 29542948	NA	NA	NA	NA	NA	NA	NA	NA	NA	NA	NA	NA	NA	NA	NA	NA	NA	NA	NA	chr6 29542947 29542948	NA	NA	NA	NA	NA	chr6 29542947 29542948	NA	NA	NA	NA	NA	NA	NA	NA	NA	NA	NA	NA	NA	NA	NA	NA	NA	NA	NA	NA	NA	NA
DDX39BP2	NA	NA	NA	NA	NA	NA	NA	NA	NA	NA	NA	NA	NA	NA	NA	NA	NA	NA	NA	NA	NA	NA	NA	NA	NA	NA	NA	NA	NA	NA	NA	NA	NA	NA	NA	NA	NA	NA	NA	NA	NA	NA	chr6 30365320 30365321	NA	NA	NA	NA	NA	NA
RPL23AP1	NA	NA	NA	NA	NA	NA	NA	NA	NA	NA	NA	NA	NA	NA	NA	NA	NA	NA	NA	NA	NA	NA	NA	NA	NA	NA	NA	NA	NA	NA	NA	NA	NA	NA	NA	NA	NA	NA	NA	NA	NA	NA	chr6 30365320 30365321	NA	NA	NA	NA	NA	NA
XXbac-BPG170G13.32	NA	NA	NA	NA	NA	NA	NA	NA	NA	NA	NA	NA	NA	NA	NA	NA	NA	NA	NA	NA	NA	NA	NA	NA	NA	NA	NA	NA	NA	NA	NA	NA	NA	NA	chr6 29938258 29938259	NA	NA	NA	NA	NA	NA	NA	NA	NA	NA	NA	NA	NA	NA
TRIM31	NA	NA	NA	NA	NA	chr6 31075481 31075482	NA	NA	NA	NA	NA	NA	NA	NA	NA	NA	NA	NA	NA	NA	NA	NA	NA	NA	NA	NA	NA	NA	NA	NA	NA	NA	NA	NA	NA	NA	NA	NA	NA	NA	NA	NA	NA	NA	NA	NA	NA	NA	NA
MOG	NA	NA	NA	NA	NA	NA	NA	NA	NA	NA	NA	NA	NA	NA	NA	NA	NA	NA	NA	NA	NA	NA	NA	NA	NA	NA	NA	NA	NA	NA	NA	NA	NA	NA	NA	NA	NA	NA	NA	NA	NA	NA	NA	chr6 30120563 30120564	NA	NA	NA	NA	NA
XXbac-BPG308K3.6	chr6 29549653 29549654	NA	NA	NA	NA	NA	NA	NA	NA	NA	chr6 29702061 29702062	NA	NA	NA	NA	NA	NA	chr6 29702061 29702062	NA	NA	chr6 29702061 29702062	NA	NA	NA	NA	chr6 29702061 29702062	NA	NA	NA	NA	NA	NA	NA	NA	NA	NA	NA	chr6 29702061 29702062	NA	chr6 29702061 29702062	chr6 29702061 29702062	NA	chr6 29549653 29549654	NA	NA	chr6 29702061 29702062	NA	NA	NA
XXbac-BPG13B8.10	NA	NA	NA	NA	NA	NA	NA	NA	NA	NA	NA	NA	NA	NA	NA	chr6 30451904 30451905	NA	NA	NA	NA	NA	NA	NA	NA	NA	NA	NA	NA	NA	NA	NA	NA	NA	NA	NA	NA	NA	NA	NA	NA	NA	NA	NA	NA	NA	NA	NA	NA	NA
OR2H4P	chr6 29549653 29549654	NA	NA	NA	NA	NA	NA	NA	NA	NA	chr6 30078275 30078276	NA	NA	NA	NA	NA	NA	NA	NA	NA	NA	NA	NA	NA	NA	chr6 30112795 30112796	NA	NA	NA	NA	NA	NA	NA	NA	NA	NA	chr6 30075103 30075104	NA	chr6 30078330 30078331	NA	NA	chr6 30078330 30078331	NA	NA	NA	NA	NA	NA	chr6 30078275 30078276
HCG17	NA	NA	NA	NA	NA	NA	chr6 31125257 31125258	NA	chr6 31125799 31125800	NA	NA	chr6 31125799 31125800	NA	chr6 31125799 31125800	chr6 31125799 31125800	NA	chr6 31079994 31079995	NA	chr6 31079994 31079995	NA	NA	NA	NA	NA	NA	NA	chr6 31079994 31079995	NA	NA	NA	NA	NA	NA	NA	NA	NA	NA	chr6 31125799 31125800	NA	NA	NA	chr6 31079994 31079995	NA	NA	chr6 31079994 31079995	chr6 30769726 30769727	NA	NA	NA
HCG16	chr6 29542947 29542948	NA	NA	NA	NA	NA	NA	NA	NA	NA	NA	NA	NA	NA	NA	NA	NA	NA	NA	NA	chr6 29542947 29542948	NA	NA	NA	NA	NA	chr6 29542947 29542948	NA	NA	NA	NA	NA	NA	NA	NA	NA	NA	NA	NA	NA	NA	NA	NA	NA	NA	NA	NA	NA	NA
TRIM40	NA	NA	NA	NA	NA	NA	NA	NA	NA	NA	NA	NA	NA	NA	NA	NA	NA	NA	NA	NA	NA	NA	NA	NA	NA	NA	NA	NA	NA	NA	NA	NA	NA	NA	NA	chr6 30105743 30105744	NA	NA	NA	NA	NA	NA	NA	NA	NA	NA	NA	NA	NA
PAIP1P1	NA	NA	NA	NA	NA	chr6 31106268 31106269	NA	NA	NA	NA	NA	NA	NA	NA	NA	NA	NA	NA	NA	NA	NA	chr6 31106268 31106269	NA	NA	NA	NA	NA	NA	NA	NA	NA	NA	NA	NA	NA	NA	NA	NA	NA	NA	NA	NA	NA	NA	NA	NA	NA	NA	chr6 31106268 31106269
RPP21	NA	NA	NA	NA	NA	NA	NA	NA	NA	NA	NA	NA	NA	chr6 31075481 31075482	NA	NA	NA	NA	NA	NA	NA	NA	chr6 31075481 31075482	NA	NA	NA	NA	chr6 31075481 31075482	NA	NA	NA	NA	NA	NA	NA	NA	NA	NA	NA	NA	NA	chr6 31075481 31075482	chr6 31075481 31075482	NA	chr6 31075481 31075482	NA	NA	NA	NA
C6orf100	NA	NA	NA	chr6 29702061 29702062	NA	NA	NA	NA	NA	NA	chr6 29702061 29702062	NA	NA	NA	NA	NA	NA	chr6 29702061 29702062	NA	chr6 29702061 29702062	chr6 29702061 29702062	NA	NA	NA	NA	chr6 29702061 29702062	NA	NA	NA	NA	NA	NA	NA	NA	NA	NA	chr6 29702061 29702062	chr6 29702061 29702062	NA	chr6 29702061 29702062	chr6 29702061 29702062	NA	NA	NA	NA	chr6 29702061 29702062	NA	NA	NA
XXbac-BPG249D20.9	NA	NA	NA	NA	NA	NA	NA	NA	NA	NA	NA	NA	NA	NA	NA	NA	NA	NA	NA	NA	NA	NA	NA	NA	NA	NA	NA	NA	NA	NA	NA	chr6 30102184 30102185	NA	NA	NA	NA	NA	NA	NA	NA	NA	NA	NA	NA	NA	NA	NA	NA	NA
GNL1	NA	rs3094228	NA	rs3094228	NA	NA	NA	NA	NA	rs3094228	rs3094228	NA	NA	NA	NA	NA	NA	NA	NA	NA	NA	NA	NA	NA	NA	NA	rs3094228	NA	NA	NA	NA	rs3094228	NA	NA	NA	NA	NA	rs3094228	rs3094228	NA	NA	NA	NA	rs3094228	NA	rs3094228	NA	NA	rs3094228
MCCD1P1	NA	chr6 29975047 29975048	NA	NA	NA	chr6 29975047 29975048	NA	NA	NA	NA	NA	NA	NA	NA	NA	NA	NA	NA	NA	NA	NA	NA	chr6 29975047 29975048	chr6 29975047 29975048	NA	NA	chr6 29975047 29975048	NA	NA	NA	NA	NA	NA	NA	chr6 29938258 29938259	NA	NA	NA	NA	NA	NA	NA	chr6 29975047 29975048	NA	NA	NA	NA	NA	chr6 29944004 29944005
HCG4P8	NA	NA	NA	NA	NA	NA	NA	NA	NA	NA	NA	NA	NA	NA	NA	NA	NA	NA	NA	NA	NA	NA	NA	NA	NA	NA	NA	NA	NA	NA	NA	NA	NA	NA	chr6 29938258 29938259	NA	NA	NA	NA	NA	NA	NA	NA	NA	NA	NA	NA	NA	NA
ETF1P1	NA	chr6 29948812 29948813	NA	NA	NA	NA	NA	NA	NA	NA	NA	NA	NA	NA	NA	NA	NA	NA	NA	NA	NA	chr6 29972984 29972985	NA	NA	NA	NA	NA	NA	NA	NA	NA	NA	NA	NA	chr6 29938258 29938259	NA	NA	NA	NA	NA	NA	NA	chr6 29938258 29938259	NA	NA	NA	NA	NA	NA
SUMO2P1	NA	chr6 29975047 29975048	NA	NA	NA	chr6 29975047 29975048	NA	NA	NA	NA	NA	NA	NA	NA	NA	NA	NA	NA	NA	NA	NA	chr6 29975047 29975048	chr6 29975047 29975048	chr6 29975047 29975048	NA	NA	chr6 29975047 29975048	NA	NA	NA	NA	NA	NA	NA	chr6 29938258 29938259	NA	NA	NA	NA	NA	NA	NA	chr6 29975047 29975048	NA	NA	NA	NA	NA	chr6 29944004 29944005
PPP1R18	NA	NA	NA	NA	NA	NA	NA	NA	NA	NA	NA	NA	NA	NA	NA	NA	NA	NA	NA	NA	NA	NA	NA	chr6 31348580 31348581	NA	NA	NA	NA	NA	NA	NA	NA	NA	NA	NA	NA	NA	NA	NA	NA	NA	NA	NA	NA	NA	NA	NA	NA	NA
NRM	NA	NA	NA	chr6 31032042 31032043	chr6 31032042 31032043	chr6 31032042 31032043	NA	chr6 31032042 31032043	NA	NA	NA	chr6 31032042 31032043	chr6 31032042 31032043	NA	chr6 31032042 31032043	NA	chr6 31032042 31032043	chr6 31032042 31032043	chr6 31032042 31032043	NA	NA	chr6 31032042 31032043	chr6 31032042 31032043	chr6 31032042 31032043	NA	NA	chr6 31032042 31032043	NA	NA	NA	NA	NA	NA	NA	NA	NA	chr6 31032042 31032043	chr6 31032042 31032043	chr6 31032042 31032043	NA	NA	NA	chr6 31032042 31032043	NA	chr6 31032042 31032043	chr6 31032042 31032043	NA	NA	NA
TRIM10	NA	NA	NA	NA	NA	NA	NA	NA	NA	NA	NA	chr6 30105743 30105744	NA	NA	NA	NA	NA	NA	NA	NA	NA	NA	NA	NA	NA	NA	NA	NA	NA	NA	NA	NA	NA	NA	NA	NA	NA	NA	NA	NA	NA	NA	NA	NA	NA	NA	NA	NA	NA
RANP1	chr6 31378510 31378511	NA	NA	chr6 31378510 31378511	chr6 31378510 31378511	chr6 31378510 31378511	NA	NA	NA	NA	NA	NA	NA	NA	NA	NA	NA	NA	NA	NA	NA	NA	chr6 31378510 31378511	NA	chr6 31378510 31378511	NA	chr6 31378510 31378511	NA	NA	NA	NA	chr6 31378510 31378511	NA	NA	NA	NA	NA	NA	NA	NA	NA	NA	NA	NA	NA	chr6 31378510 31378511	NA	NA	NA
DHX16	NA	NA	NA	chr6 30101656 30101657	NA	NA	NA	NA	NA	NA	NA	NA	NA	NA	NA	NA	NA	NA	NA	NA	NA	NA	NA	NA	NA	NA	NA	NA	NA	NA	NA	chr6 30101656 30101657	NA	NA	NA	NA	NA	NA	NA	NA	NA	NA	NA	NA	NA	NA	NA	NA	NA
IER3	NA	NA	NA	NA	NA	NA	NA	NA	NA	NA	NA	NA	NA	NA	NA	NA	NA	NA	NA	NA	NA	NA	NA	chr6 31336891 31336892	NA	NA	NA	NA	NA	NA	NA	NA	NA	NA	NA	NA	NA	NA	NA	NA	NA	NA	NA	NA	NA	NA	NA	NA	NA
TUBB	NA	NA	NA	NA	NA	NA	NA	chr6 31080471 31080472	NA	NA	NA	NA	NA	chr6 31080471 31080472	NA	NA	NA	chr6 31080471 31080472	NA	NA	NA	chr6 31080471 31080472	chr6 31080471 31080472	chr6 31080471 31080472	NA	NA	chr6 31080471 31080472	chr6 31080471 31080472	NA	NA	NA	NA	NA	NA	chr6 31080471 31080472	NA	chr6 31080471 31080472	chr6 31080471 31080472	chr6 31080471 31080472	chr6 31080471 31080472	NA	NA	chr6 31080471 31080472	NA	chr6 31080471 31080472	chr6 31080471 31080472	NA	NA	NA
MRPS18B	NA	chr6 30817866 30817867	NA	chr6 30817866 30817867	NA	NA	NA	NA	NA	NA	NA	NA	NA	NA	NA	NA	NA	NA	NA	NA	NA	NA	NA	NA	NA	NA	NA	NA	NA	NA	NA	NA	NA	NA	NA	NA	NA	NA	NA	NA	NA	NA	NA	NA	NA	NA	NA	NA	chr6 30817866 30817867
DDR1-AS1	NA	NA	NA	NA	NA	NA	NA	NA	NA	NA	NA	NA	NA	NA	NA	NA	NA	NA	NA	NA	NA	NA	NA	NA	NA	NA	NA	NA	NA	NA	NA	NA	NA	NA	NA	NA	NA	NA	NA	NA	NA	NA	NA	NA	NA	NA	NA	NA	chr6 30805921 30805922
TRIM26BP	NA	NA	NA	chr6 30045199 30045200	NA	NA	NA	NA	NA	NA	NA	NA	NA	NA	NA	NA	NA	NA	NA	NA	NA	NA	NA	NA	NA	chr6 30045199 30045200	NA	NA	NA	NA	NA	NA	NA	NA	NA	NA	NA	NA	NA	NA	NA	NA	NA	NA	NA	NA	NA	NA	NA
C6orf15	NA	NA	NA	NA	NA	NA	NA	chr6 31053257 31053258	NA	NA	NA	NA	chr6 31053257 31053258	chr6 31053257 31053258	NA	NA	NA	chr6 31053257 31053258	NA	NA	NA	NA	chr6 31053257 31053258	chr6 31053257 31053258	NA	NA	NA	NA	NA	NA	NA	NA	NA	NA	NA	NA	NA	NA	NA	NA	NA	NA	NA	NA	NA	NA	NA	NA	NA
XXbac-BPG252P9.10	NA	NA	NA	NA	NA	NA	NA	NA	NA	NA	NA	NA	NA	NA	NA	NA	NA	NA	NA	NA	NA	NA	NA	NA	NA	NA	NA	NA	NA	NA	NA	NA	NA	NA	NA	NA	NA	NA	NA	NA	NA	NA	NA	NA	NA	NA	NA	NA	chr6 30805921 30805922
CDSN	NA	NA	NA	NA	NA	NA	NA	NA	NA	NA	NA	NA	NA	NA	NA	NA	NA	NA	NA	NA	NA	NA	NA	NA	NA	NA	NA	NA	chr6 31931137 31931138	NA	NA	NA	NA	NA	NA	NA	NA	NA	NA	NA	NA	NA	NA	chr6 31931137 31931138	NA	NA	NA	NA	NA
XXbac-BPG181B23.7	NA	NA	NA	NA	NA	NA	NA	NA	NA	NA	NA	NA	NA	NA	NA	NA	NA	NA	NA	NA	NA	NA	NA	chr6 31348580 31348581	NA	NA	NA	NA	NA	NA	NA	NA	NA	NA	NA	NA	NA	NA	NA	NA	NA	NA	NA	NA	NA	NA	NA	NA	NA
Y_RNA	NA	NA	NA	NA	NA	NA	NA	NA	NA	NA	NA	NA	NA	NA	NA	NA	NA	NA	NA	NA	NA	NA	NA	chr6 31348580 31348581	NA	NA	NA	NA	NA	NA	NA	NA	NA	NA	NA	NA	NA	NA	NA	NA	NA	NA	NA	NA	NA	NA	NA	NA	NA
PRR3	chr6 31242762 31242763	NA	NA	NA	NA	chr6 31242762 31242763	NA	NA	NA	NA	NA	NA	NA	NA	NA	NA	NA	NA	NA	NA	NA	NA	chr6 31242762 31242763	chr6 31242762 31242763	NA	NA	NA	NA	NA	NA	NA	NA	NA	NA	NA	NA	NA	NA	NA	NA	NA	NA	NA	NA	NA	NA	NA	NA	NA
XXbac-BPG181B23.4	NA	NA	NA	NA	NA	NA	NA	NA	NA	NA	NA	NA	NA	NA	NA	NA	NA	NA	NA	NA	NA	NA	NA	chr6 31336891 31336892	NA	NA	NA	NA	NA	NA	NA	NA	NA	NA	NA	NA	NA	NA	NA	NA	NA	NA	NA	NA	NA	NA	NA	NA	NA
APOM	NA	NA	NA	NA	NA	NA	NA	NA	NA	NA	NA	NA	NA	chr6 31080471 31080472	NA	NA	NA	chr6 31080471 31080472	NA	NA	NA	NA	chr6 31055423 31055424	chr6 31055423 31055424	NA	NA	NA	NA	NA	NA	NA	NA	NA	NA	NA	NA	NA	NA	NA	NA	NA	NA	NA	NA	NA	NA	NA	NA	NA
GPANK1	NA	NA	NA	NA	NA	NA	chr6 32266490 32266491	NA	NA	NA	NA	NA	NA	NA	NA	NA	NA	NA	NA	NA	NA	NA	NA	NA	NA	NA	NA	NA	NA	NA	NA	NA	NA	NA	NA	NA	NA	NA	NA	NA	NA	NA	NA	NA	NA	NA	NA	NA	NA
LY6G5C	NA	NA	NA	NA	NA	NA	NA	NA	NA	NA	NA	NA	NA	NA	NA	NA	NA	NA	NA	NA	NA	NA	NA	chr6 31348580 31348581	NA	NA	NA	NA	NA	NA	NA	NA	NA	NA	NA	NA	NA	NA	NA	NA	NA	NA	NA	NA	NA	NA	NA	NA	NA
CLIC1	NA	NA	NA	NA	NA	NA	NA	NA	NA	NA	NA	NA	NA	NA	NA	NA	NA	NA	NA	NA	NA	NA	NA	NA	NA	NA	NA	NA	NA	NA	NA	NA	NA	NA	NA	NA	NA	NA	NA	NA	NA	NA	NA	NA	chr6 32611641 32611642	NA	NA	NA	NA
DDAH2	NA	NA	NA	NA	NA	NA	NA	NA	NA	NA	NA	NA	NA	NA	NA	NA	NA	NA	NA	NA	NA	NA	NA	NA	NA	NA	NA	NA	NA	NA	NA	NA	NA	NA	NA	NA	NA	NA	NA	NA	NA	NA	NA	NA	chr6 32575325 32575326	NA	NA	NA	NA
CSNK2B	NA	NA	NA	NA	NA	NA	NA	NA	NA	NA	NA	NA	NA	NA	NA	NA	NA	NA	NA	NA	NA	NA	NA	NA	NA	NA	NA	NA	NA	NA	NA	NA	NA	NA	NA	NA	NA	NA	NA	NA	NA	NA	NA	NA	chr6 32590925 32590926	NA	NA	NA	NA
C6orf25	NA	NA	NA	NA	chr6 32663999 32664000	NA	NA	NA	NA	NA	NA	NA	NA	NA	NA	NA	NA	NA	chr6 32663999 32664000	NA	NA	NA	NA	NA	NA	NA	NA	NA	NA	NA	NA	NA	chr6 32663999 32664000	NA	NA	NA	NA	NA	NA	NA	NA	NA	NA	NA	NA	NA	NA	NA	NA
RNU6-850P	chr6 32581889 32581890	NA	NA	chr6 30769726 30769727	NA	NA	NA	NA	chr6 30769726 30769727	chr6 30769726 30769727	chr6 30769726 30769727	chr6 30769726 30769727	NA	NA	NA	chr6 30769726 30769727	NA	NA	NA	chr6 32581889 32581890	NA	NA	NA	NA	chr6 30769726 30769727	NA	chr6 30769726 30769727	chr6 32581889 32581890	chr6 32581889 32581890	NA	NA	chr6 30769726 30769727	NA	chr6 32581889 32581890	chr6 30769726 30769727	NA	NA	NA	NA	NA	chr6 32581889 32581890	NA	NA	NA	chr6 32581889 32581890	chr6 30769726 30769727	chr6 32581889 32581890	chr6 32581889 32581890	chr6 30769726 30769727
LY6G6E	NA	NA	NA	NA	NA	NA	NA	NA	NA	NA	NA	NA	NA	NA	NA	NA	NA	NA	NA	NA	NA	NA	NA	NA	NA	NA	NA	NA	NA	NA	NA	NA	NA	NA	NA	NA	NA	NA	NA	NA	NA	NA	NA	NA	chr6 32312082 32312083	NA	NA	NA	NA
LSM2	NA	NA	NA	NA	NA	NA	chr6 32266490 32266491	NA	NA	NA	NA	NA	NA	NA	NA	NA	NA	NA	NA	NA	NA	NA	NA	NA	NA	NA	NA	NA	NA	NA	NA	NA	NA	NA	NA	NA	NA	NA	NA	NA	NA	NA	NA	NA	NA	NA	NA	NA	NA
HSPA1L	NA	chr6 31348580 31348581	NA	NA	NA	NA	NA	NA	NA	NA	NA	NA	NA	NA	NA	NA	NA	NA	NA	NA	NA	NA	NA	chr6 31348580 31348581	NA	NA	NA	NA	NA	NA	NA	NA	NA	NA	NA	NA	NA	NA	NA	NA	NA	NA	NA	NA	NA	NA	NA	NA	NA
PPP1R10	chr6 31106268 31106269	chr6 31106268 31106269	NA	chr6 31106268 31106269	NA	chr6 31106268 31106269	NA	NA	NA	NA	NA	NA	NA	NA	NA	chr6 31106268 31106269	NA	NA	NA	chr6 31106268 31106269	NA	chr6 31106268 31106269	NA	chr6 31106268 31106269	chr6 31106268 31106269	NA	chr6 31106268 31106269	chr6 31106268 31106269	NA	NA	NA	NA	NA	NA	chr6 31106268 31106269	NA	NA	NA	NA	NA	NA	NA	NA	NA	chr6 31106268 31106269	chr6 31106268 31106269	NA	NA	chr6 31106268 31106269
SAPCD1	NA	NA	NA	NA	NA	NA	NA	NA	NA	NA	NA	chr6 32664093 32664094	NA	NA	NA	chr6 32664093 32664094	NA	NA	NA	NA	NA	NA	NA	NA	NA	NA	NA	NA	NA	NA	NA	NA	NA	NA	NA	NA	chr6 32664093 32664094	NA	NA	NA	NA	NA	NA	NA	NA	NA	NA	NA	chr6 32664093 32664094
MUC21	NA	NA	NA	NA	NA	NA	NA	NA	NA	NA	NA	NA	NA	NA	NA	NA	NA	NA	NA	NA	NA	NA	NA	NA	NA	NA	NA	NA	chr6 31931137 31931138	NA	NA	chr6 31931137 31931138	NA	chr6 31931137 31931138	NA	NA	NA	NA	NA	NA	chr6 31931137 31931138	NA	NA	chr6 31931137 31931138	NA	NA	NA	NA	NA
NEU1	NA	NA	NA	NA	NA	chr6 31106268 31106269	NA	NA	NA	NA	NA	NA	NA	NA	NA	NA	NA	NA	NA	NA	chr6 31603591 31603592	NA	NA	NA	chr6 31603591 31603592	NA	chr6 31603591 31603592	chr6 31603591 31603592	NA	NA	NA	NA	NA	NA	NA	NA	chr6 31603591 31603592	NA	NA	NA	NA	NA	NA	NA	NA	NA	chr6 31603591 31603592	NA	NA
C2	NA	NA	NA	NA	NA	NA	NA	NA	NA	NA	NA	NA	NA	NA	NA	NA	NA	NA	NA	NA	NA	rs1142338	NA	NA	NA	NA	NA	NA	NA	NA	NA	NA	NA	NA	NA	NA	NA	NA	NA	NA	NA	NA	NA	NA	NA	NA	NA	NA	NA
SLC44A4	NA	NA	chr6 32074804 32074805	NA	NA	NA	NA	NA	NA	NA	NA	NA	NA	NA	NA	NA	NA	NA	NA	NA	NA	NA	NA	NA	NA	NA	NA	NA	NA	NA	NA	NA	NA	NA	NA	NA	NA	NA	NA	NA	NA	NA	NA	NA	NA	NA	NA	NA	NA
NCR3	NA	NA	NA	NA	NA	NA	NA	NA	NA	NA	NA	NA	NA	NA	NA	NA	NA	NA	NA	NA	NA	NA	NA	NA	NA	chr6 31192796 31192797	NA	NA	NA	NA	NA	NA	NA	NA	NA	NA	NA	NA	NA	NA	NA	NA	NA	NA	NA	NA	NA	NA	NA
VARS	NA	NA	NA	chr6 31053257 31053258	NA	chr6 31053257 31053258	NA	chr6 31053257 31053258	NA	NA	NA	NA	chr6 31053257 31053258	chr6 31053257 31053258	NA	NA	chr6 31053257 31053258	chr6 31053257 31053258	NA	NA	NA	NA	chr6 31053257 31053258	chr6 31053257 31053258	NA	chr6 31053257 31053258	chr6 31053257 31053258	NA	NA	NA	NA	NA	NA	NA	chr6 31045574 31045575	NA	NA	chr6 31053257 31053258	chr6 31053257 31053258	NA	NA	NA	chr6 31053257 31053258	NA	chr6 31053257 31053258	chr6 31053257 31053258	NA	NA	NA
LTA	NA	NA	chr6 32074804 32074805	NA	NA	NA	NA	NA	NA	NA	NA	NA	NA	NA	NA	NA	NA	NA	NA	NA	NA	NA	NA	NA	NA	NA	NA	NA	NA	NA	NA	NA	NA	NA	NA	NA	NA	NA	NA	NA	NA	NA	NA	NA	NA	NA	NA	NA	NA
VWA7	NA	NA	NA	NA	NA	NA	NA	NA	NA	NA	NA	NA	NA	NA	NA	NA	NA	NA	NA	NA	NA	NA	NA	NA	NA	NA	NA	NA	NA	NA	NA	NA	NA	NA	NA	NA	NA	NA	NA	NA	NA	NA	NA	chr6 32599999 32600000	NA	NA	NA	NA	NA
TNF	NA	NA	NA	NA	NA	NA	NA	NA	NA	NA	NA	NA	NA	NA	NA	NA	NA	NA	NA	NA	NA	NA	NA	NA	NA	chr6 30984128 30984129	NA	NA	NA	NA	NA	NA	NA	NA	NA	NA	NA	NA	NA	NA	NA	NA	NA	NA	NA	NA	NA	NA	chr6 30984128 30984129
CFB	NA	NA	NA	NA	NA	NA	NA	NA	NA	NA	NA	NA	NA	NA	NA	NA	NA	NA	NA	NA	NA	NA	NA	NA	NA	NA	NA	NA	NA	NA	NA	NA	NA	NA	NA	NA	NA	NA	NA	NA	NA	NA	NA	NA	chr6 32388144 32388145	NA	NA	NA	NA
NELFE	NA	NA	NA	NA	NA	NA	chr6 32266490 32266491	NA	NA	NA	NA	NA	NA	NA	NA	NA	NA	NA	NA	NA	NA	NA	NA	NA	NA	NA	NA	NA	NA	NA	NA	NA	NA	NA	NA	NA	NA	NA	NA	NA	NA	NA	NA	NA	NA	NA	NA	NA	NA
TNXB	NA	NA	NA	NA	NA	NA	NA	NA	NA	NA	NA	NA	NA	NA	NA	NA	NA	NA	NA	NA	NA	NA	NA	NA	NA	NA	NA	NA	NA	NA	NA	NA	NA	NA	NA	NA	NA	NA	NA	NA	NA	NA	NA	NA	NA	NA	NA	NA	chr6 32569691 32569692
FKBPL	NA	NA	NA	NA	chr6 32548550 32548551	NA	NA	NA	NA	NA	NA	chr6 32548550 32548551	NA	NA	NA	NA	NA	NA	NA	NA	NA	NA	NA	NA	NA	NA	NA	NA	NA	NA	NA	NA	NA	NA	NA	NA	NA	NA	NA	NA	NA	NA	NA	NA	NA	NA	NA	NA	NA
PPT2	NA	NA	NA	NA	NA	NA	NA	NA	NA	NA	NA	NA	NA	NA	NA	NA	NA	NA	NA	NA	NA	NA	NA	NA	NA	NA	rs2844532	NA	NA	NA	NA	NA	NA	NA	NA	NA	NA	NA	NA	NA	NA	NA	NA	NA	NA	NA	NA	NA	NA
HSPA1A	NA	NA	NA	NA	NA	NA	NA	NA	NA	NA	NA	NA	NA	NA	NA	NA	NA	NA	NA	NA	NA	NA	NA	NA	NA	NA	NA	NA	NA	NA	NA	NA	NA	NA	NA	NA	chr6 31726688 31726689	NA	NA	NA	NA	NA	NA	NA	chr6 31946614 31946615	NA	NA	NA	NA
AIF1	NA	NA	NA	NA	NA	NA	NA	NA	NA	NA	NA	NA	NA	NA	NA	NA	NA	NA	NA	NA	chr6 31493888 31493889	NA	NA	chr6 31493888 31493889	NA	NA	NA	NA	NA	NA	NA	NA	NA	NA	NA	NA	chr6 31726688 31726689	NA	NA	NA	NA	NA	NA	NA	NA	NA	chr6 31726688 31726689	NA	NA
DHFRP2	NA	NA	NA	chr6 31377047 31377048	NA	NA	NA	chr6 31377047 31377048	NA	chr6 31377047 31377048	chr6 31377047 31377048	NA	NA	NA	NA	NA	NA	NA	NA	NA	NA	NA	NA	NA	NA	NA	NA	NA	NA	NA	NA	NA	NA	chr6 31377047 31377048	NA	NA	NA	chr6 31377047 31377048	NA	NA	NA	chr6 31377047 31377048	NA	NA	chr6 31377047 31377048	chr6 31377047 31377048	NA	NA	chr6 31377047 31377048
USP8P1	chr6 31922254 31922255	NA	NA	NA	NA	NA	NA	NA	NA	NA	NA	NA	NA	NA	NA	chr6 31922254 31922255	NA	NA	NA	NA	NA	NA	NA	NA	NA	NA	NA	NA	NA	NA	NA	NA	NA	NA	NA	NA	NA	NA	NA	NA	NA	NA	NA	NA	NA	NA	NA	NA	NA
EHMT2	NA	NA	NA	NA	NA	NA	NA	NA	NA	NA	NA	NA	NA	NA	NA	NA	NA	NA	NA	NA	NA	NA	NA	NA	NA	NA	NA	NA	NA	NA	chr6 32663999 32664000	NA	NA	NA	NA	NA	NA	NA	NA	NA	NA	NA	NA	NA	NA	NA	chr6 32663999 32664000	NA	NA
GPSM3	NA	NA	chr6 32074804 32074805	NA	NA	NA	NA	NA	NA	NA	NA	NA	NA	NA	NA	NA	NA	NA	NA	NA	NA	NA	NA	NA	NA	NA	NA	NA	NA	NA	NA	NA	NA	NA	NA	NA	NA	NA	NA	NA	NA	NA	NA	NA	NA	NA	NA	NA	NA
XXbac-BPG181B23.6	NA	NA	NA	NA	NA	NA	NA	NA	NA	NA	NA	NA	NA	NA	NA	NA	NA	NA	NA	NA	NA	NA	chr6 31420500 31420501	NA	NA	NA	NA	NA	NA	NA	NA	NA	NA	NA	NA	NA	NA	NA	NA	NA	NA	NA	NA	NA	NA	NA	NA	NA	NA
EHMT2-AS1	chr6 32151222 32151223	NA	NA	NA	NA	NA	NA	NA	NA	NA	NA	NA	NA	NA	NA	NA	NA	NA	NA	NA	NA	NA	NA	NA	NA	NA	NA	NA	NA	NA	NA	NA	NA	NA	NA	NA	NA	NA	NA	NA	NA	NA	NA	NA	NA	NA	NA	NA	NA
LY6G6F	NA	NA	NA	NA	NA	NA	NA	NA	NA	NA	NA	NA	NA	NA	NA	NA	NA	NA	NA	NA	NA	NA	NA	NA	NA	NA	NA	NA	NA	NA	NA	NA	NA	NA	NA	NA	NA	NA	NA	NA	NA	NA	NA	NA	chr6 31804729 31804730	NA	NA	NA	NA
C6orf47	NA	NA	NA	NA	NA	NA	NA	NA	NA	NA	NA	NA	NA	NA	NA	NA	NA	NA	NA	NA	NA	NA	NA	NA	NA	chr6 31678774 31678775	NA	NA	NA	NA	NA	NA	NA	NA	NA	NA	NA	NA	NA	NA	NA	NA	NA	NA	NA	NA	NA	NA	NA
C2-AS1	NA	NA	NA	NA	NA	NA	NA	NA	NA	NA	NA	NA	NA	NA	NA	NA	NA	NA	NA	NA	NA	NA	NA	NA	NA	NA	NA	NA	NA	NA	NA	NA	NA	NA	NA	NA	NA	NA	NA	NA	NA	NA	NA	NA	chr6 31933161 31933162	NA	NA	NA	NA
TAPSAR1	NA	NA	NA	NA	NA	NA	NA	NA	NA	NA	NA	NA	NA	NA	NA	NA	NA	NA	NA	NA	NA	NA	NA	NA	NA	NA	NA	NA	NA	NA	NA	NA	NA	NA	NA	NA	NA	NA	NA	NA	NA	NA	NA	NA	chr6 32757971 32757972	NA	NA	NA	NA
HLA-DMA	NA	NA	NA	NA	NA	NA	NA	NA	NA	NA	NA	NA	NA	NA	NA	NA	NA	NA	NA	NA	NA	NA	NA	NA	NA	NA	NA	NA	NA	NA	NA	NA	NA	NA	NA	NA	NA	NA	NA	NA	NA	NA	NA	NA	NA	NA	chr6 32663999 32664000	NA	NA
BRD2	NA	NA	NA	NA	NA	NA	NA	NA	NA	NA	NA	NA	NA	NA	NA	NA	NA	NA	NA	NA	NA	rs482044	NA	NA	NA	NA	NA	NA	NA	NA	NA	NA	NA	NA	NA	NA	NA	NA	NA	NA	NA	NA	NA	rs482044	NA	NA	NA	NA	NA
SLC39A7	NA	NA	NA	NA	NA	NA	NA	NA	NA	NA	NA	NA	NA	NA	NA	NA	NA	NA	NA	NA	NA	NA	NA	NA	NA	chr6 32179896 32179897	NA	NA	NA	NA	NA	NA	NA	NA	NA	NA	NA	NA	NA	NA	NA	NA	NA	NA	NA	NA	NA	NA	NA
PSMB8	NA	NA	NA	NA	NA	NA	NA	NA	NA	NA	NA	NA	NA	NA	NA	NA	NA	NA	NA	NA	NA	NA	NA	NA	NA	NA	NA	NA	NA	NA	NA	NA	NA	NA	NA	NA	NA	NA	NA	NA	NA	NA	NA	NA	chr6 32764315 32764316	NA	NA	NA	NA
B3GALT4	NA	NA	NA	chr6 33138677 33138678	NA	NA	NA	NA	NA	NA	NA	NA	NA	NA	NA	NA	NA	NA	NA	NA	chr6 33138677 33138678	NA	NA	NA	NA	NA	NA	NA	NA	NA	NA	NA	NA	NA	NA	NA	NA	NA	NA	NA	NA	NA	NA	NA	NA	NA	NA	NA	NA
RXRB	NA	NA	NA	NA	NA	NA	chr6 32590953 32590954	chr6 32590953 32590954	chr6 32590953 32590954	chr6 32590953 32590954	NA	NA	chr6 32590953 32590954	NA	NA	chr6 32590953 32590954	NA	NA	chr6 32590953 32590954	NA	NA	NA	NA	NA	NA	NA	NA	NA	NA	NA	NA	chr6 32590953 32590954	NA	NA	chr6 32590953 32590954	NA	chr6 32590953 32590954	NA	NA	NA	NA	NA	NA	NA	NA	NA	NA	NA	chr6 32590953 32590954
PHF1	NA	NA	NA	NA	NA	NA	NA	NA	NA	NA	NA	NA	NA	NA	NA	NA	NA	NA	NA	NA	NA	NA	NA	NA	NA	NA	NA	NA	NA	NA	NA	NA	NA	NA	NA	NA	NA	NA	NA	NA	NA	NA	NA	NA	NA	NA	NA	NA	chr6 32383138 32383139
SYNGAP1	chr6 32389305 32389306	chr6 32389305 32389306	NA	NA	NA	NA	NA	NA	chr6 32389305 32389306	NA	chr6 32389305 32389306	NA	NA	NA	NA	NA	chr6 32389305 32389306	NA	NA	NA	NA	NA	NA	NA	NA	chr6 32389305 32389306	NA	NA	NA	NA	NA	chr6 32389305 32389306	NA	NA	NA	NA	NA	NA	NA	NA	chr6 32389305 32389306	NA	NA	NA	NA	chr6 32389305 32389306	NA	NA	chr6 32389305 32389306
VPS52	chr6 32629755 32629756	chr6 32629755 32629756	NA	chr6 32629755 32629756	chr6 32629755 32629756	chr6 32629755 32629756	chr6 32629755 32629756	chr6 32629755 32629756	chr6 32629755 32629756	NA	chr6 32629755 32629756	chr6 32629755 32629756	chr6 32629755 32629756	chr6 32629755 32629756	NA	NA	chr6 32629755 32629756	chr6 32629755 32629756	chr6 32629755 32629756	chr6 32629755 32629756	NA	chr6 32629755 32629756	chr6 32629755 32629756	chr6 32629755 32629756	chr6 32629755 32629756	chr6 32629755 32629756	chr6 32629755 32629756	NA	chr6 32629755 32629756	NA	chr6 32629755 32629756	chr6 32629755 32629756	chr6 32629755 32629756	chr6 32629755 32629756	chr6 32629755 32629756	chr6 32629755 32629756	chr6 32629755 32629756	chr6 32629755 32629756	chr6 32629755 32629756	chr6 32629755 32629756	chr6 32629755 32629756	chr6 32629755 32629756	chr6 32629755 32629756	chr6 32629755 32629756	chr6 32629755 32629756	chr6 32629755 32629756	chr6 32629755 32629756	chr6 32629755 32629756	chr6 32629755 32629756
ZBTB22	NA	NA	NA	NA	NA	NA	NA	NA	NA	NA	chr6 32671103 32671104	NA	NA	NA	NA	NA	NA	NA	NA	NA	NA	NA	NA	NA	NA	NA	NA	NA	NA	NA	NA	NA	NA	NA	NA	NA	NA	NA	NA	NA	NA	NA	NA	NA	chr6 32671103 32671104	NA	NA	chr6 32671103 32671104	NA
GGNBP1	NA	NA	NA	chr6 32578653 32578654	NA	NA	NA	NA	NA	NA	NA	NA	NA	NA	NA	NA	NA	NA	NA	NA	NA	NA	NA	NA	NA	NA	NA	NA	NA	NA	NA	NA	NA	NA	NA	NA	NA	NA	NA	NA	NA	NA	NA	NA	chr6 32578653 32578654	NA	NA	NA	NA
RGL2	NA	NA	NA	NA	NA	NA	NA	NA	NA	NA	NA	NA	NA	NA	NA	NA	NA	NA	NA	chr6 32600803 32600804	NA	NA	NA	NA	NA	NA	chr6 32595223 32595224	NA	NA	NA	NA	NA	NA	chr6 32600803 32600804	NA	NA	NA	NA	NA	NA	NA	NA	NA	NA	NA	NA	NA	NA	NA
KIFC1	chr6 32634467 32634468	chr6 32634318 32634319	NA	chr6 32634467 32634468	chr6 32634318 32634319	chr6 32634467 32634468	chr6 32634318 32634319	chr6 32634318 32634319	chr6 32634318 32634319	chr6 32634318 32634319	chr6 32634318 32634319	chr6 32634318 32634319	chr6 32634318 32634319	chr6 32634318 32634319	chr6 32634318 32634319	chr6 32634318 32634319	chr6 32634318 32634319	chr6 32634318 32634319	chr6 32634318 32634319	chr6 32634318 32634319	NA	chr6 32634318 32634319	chr6 32634318 32634319	chr6 32634467 32634468	chr6 32634318 32634319	chr6 32634467 32634468	chr6 32634467 32634468	chr6 32634318 32634319	chr6 32634318 32634319	NA	chr6 32634318 32634319	chr6 32634467 32634468	chr6 32634318 32634319	chr6 32634318 32634319	chr6 32634318 32634319	chr6 32634318 32634319	chr6 32634318 32634319	chr6 32634318 32634319	chr6 32634467 32634468	chr6 32634318 32634319	chr6 32634318 32634319	chr6 32634318 32634319	chr6 32634318 32634319	chr6 32634318 32634319	chr6 32634467 32634468	chr6 32634318 32634319	NA	chr6 32634318 32634319	chr6 32634467 32634468
HLA-DOA	NA	NA	NA	NA	NA	NA	NA	NA	NA	NA	NA	NA	NA	NA	NA	NA	NA	NA	NA	NA	NA	NA	NA	rs1126511	NA	NA	NA	NA	NA	NA	NA	NA	NA	NA	NA	NA	NA	NA	NA	NA	NA	NA	NA	NA	NA	NA	NA	NA	NA
RING1	NA	NA	NA	rs9469378	NA	NA	NA	NA	NA	NA	NA	NA	NA	NA	NA	NA	NA	NA	NA	NA	rs9469378	NA	NA	NA	NA	rs9469378	NA	NA	NA	NA	NA	NA	NA	NA	NA	NA	NA	NA	NA	NA	NA	NA	NA	NA	NA	NA	NA	NA	NA
UQCC2	NA	NA	NA	NA	NA	NA	NA	NA	NA	NA	NA	NA	NA	NA	NA	NA	NA	NA	NA	NA	NA	NA	NA	NA	NA	NA	NA	NA	NA	NA	NA	NA	NA	chr6 33138839 33138840	NA	NA	NA	NA	NA	chr6 33138839 33138840	NA	NA	NA	NA	NA	NA	NA	NA	NA
HLA-DPA2	NA	NA	NA	NA	NA	NA	NA	NA	NA	NA	NA	NA	NA	NA	NA	NA	NA	NA	NA	NA	NA	NA	NA	rs1126511	NA	NA	NA	NA	NA	NA	NA	NA	NA	NA	NA	NA	NA	NA	NA	NA	NA	NA	NA	NA	NA	NA	NA	NA	NA
LEMD2	NA	NA	NA	NA	NA	NA	NA	NA	NA	NA	NA	NA	NA	NA	NA	NA	NA	NA	NA	NA	NA	NA	NA	rs1126511	NA	NA	NA	NA	NA	NA	NA	NA	NA	NA	NA	NA	NA	NA	NA	NA	NA	NA	NA	NA	NA	NA	NA	NA	NA
XXbac-BPG157A10.21	NA	NA	NA	NA	NA	NA	NA	NA	NA	NA	NA	NA	NA	NA	NA	NA	NA	NA	NA	NA	NA	NA	NA	NA	NA	NA	NA	NA	NA	NA	NA	NA	NA	NA	chr6 33055098 33055099	NA	NA	NA	NA	NA	NA	NA	NA	NA	NA	NA	NA	NA	NA
ITPR3	NA	NA	NA	NA	NA	NA	NA	NA	NA	NA	NA	NA	NA	NA	NA	NA	NA	NA	NA	NA	NA	NA	NA	NA	NA	rs9469378	NA	NA	NA	NA	NA	NA	NA	NA	NA	NA	NA	NA	NA	NA	NA	NA	NA	NA	NA	NA	NA	NA	NA
CUTA	chr6 33082308 33082309	chr6 33082308 33082309	NA	NA	NA	chr6 33082308 33082309	NA	NA	NA	NA	NA	NA	NA	NA	NA	NA	NA	NA	NA	NA	NA	NA	NA	NA	NA	NA	NA	NA	NA	NA	NA	NA	NA	NA	chr6 33082308 33082309	NA	NA	NA	NA	chr6 33082308 33082309	NA	chr6 33082308 33082309	NA	NA	NA	NA	NA	NA	chr6 33082308 33082309
In each row the eGENE and the SNP correlated with their expression
In each column the Tissues from GTEx database
Base pair positions in build hg38

## Sheet: SuppTable4
Supplementary Table 4. Number of patients with clinical and serological information included in the study.
GWAS Study	lcSSc (%)	dcSSc (%)	ACA+ (%)	ATA+ (%)	ARA+ (%)	Total Cases
Spain 1	220 (60.94)	90 (24.93)	170 (47.09)	80 (22.16)	NA	361
Germany 1	148 (57.58)	100 (38.91)	116 (45.13	76 (29.57)	NA	257
Netherlands 1	125 (68.30)	40 (21.85)	42 (22.95)	42 (22.95)	NA	183
USA 1	822 (60.21)	466 (34.13)	395 (28.93)	210 (15.38)	NA	1365
France	341 (63.03)	177 (32.71)	191 (35.30)	123 (22.73)	NA	541
Spain 2	684 (58.51)	282 (24.12)	470 (40.20)	221 (18.90)	25 (2.13)	1169
Germany 2	180 (49.45)	120 (32.96)	133 (36.53)	95 (26.09)	NA	364
Netherlands 2	296 (65.92)	95 (21.15)	143 (31.84)	74 (16.48)	NA	449
USA 2	750 (58.32)	471 (36.62)	411 (31.95)	193 (15.00)	218 (16.95)	1286
Italy	588 (58.91)	193 (19.33)	436 (43.68)	328 (32.86)	197 (19.73)	998
UK	774 (70.74)	236 (21.57)	396 (36.19)	173 (15.81)	118 (10.78)	1094
Sweden	120 (70.58)	50 (29.41)	44 (25.88)	25 (14.70)	NA	170
Norway	59 (61.45)	31 (32.29)	49 (51.04)	15 (15.62)	NA	96
Australia/UK	579 (75.98)	173 (22.70)	348 (45.66)	94 (12.33)	NA	762
Total	5,686 (62.52)	2,524 (27.75)	3,344 (36.77)	1,749 (19.20)	558 (6.14)	9095

## Sheet: SuppTable5
Supplementary Table 5. Sequential conditional analysis results with limited cutaneous systemic sclerosis.
Gene	Alleles	Meta p-valuea	OR	Conditioned p-value
HLA-DQA1	DQA1*02:01	5.23e-51	0.54	--
HLA-DRB1	DRB1*08:01	2.74e-33	2.18	8.07e-29
HLA-DRB1	DRB1*11:04	2.69e-26	1.81	5.02e-24
HLA-DQB1	DQB1*05:01	1.07e-21	1.38	7.34e-21
HLA-DPB1	DPB1*13:01	5.46e-14	1.73	2.18e-17
HLA-DRB1	DRB1*13:01	1.94e-11	0.69	1.85e-09
AA_DRB1_67_32659947_I	4.66e-69	0.64	--	SSc
AA_DRB1_-17_32665460_A	3.99e-16	1.23	7.32e-24	lcSSc
AA_DPB1_11_33156445	2.09e-12	1.21	4.03e-15	SSc
AA_DQB1_135_32737883_D	7.17e-50	0.48	6.23e-14	lcSSc
AA_DQA1_69_32717257_T	1.59e-33	2.07	2.3e-13	SSc
AA_DRB1_58_32659974_A	4.58e-14	1.33	2.11e-08	SSc, dcSSc
rs1048372 (SNP_DQA1_32718414)	1.28e-72	0.63	--	SSc
rs1142338 (SNP_DQA1_32717300)	6.86e-33	2.09	9.09e-23	SSc
rs17885129 (SNP_DRB1_32659977_TC)	3e-47	0.61	2.98e-18	lcSSc
rs1126511 (SNP_DPB1_33156444)	2.09e-12	1.21	3.47e-12	SSc
rs2844532	3.02e-21	0.74	3.47e-12	SSc
rs17500468	5.37e-22	1.37	3.25e-09	SSc
rs7738815	4.44e-07	1.44	5.82e-09	lcSSc
In boldface the alleles exclusively associated with this clinical phenotype, OR: Odds ratio
aComparisons were performed with the control group

## Sheet: SuppTable6
Supplementary Table 6. Sequential conditional analysis results with diffuse cutaneous systemic sclerosis.
Gene	Alleles	Meta p-valuea	OR	Conditioned p-value
HLA-DRB1	DRB1*11:04	3.32e-75	3.18	--
HLA-DPB1	DPB1*13:01	2.94e-44	3.12	3.82e-41
HLA-DQA1	DQA1*05:01	1.16e-30	1.49	1.59e-11
In Boldface the alleles exclusively associated with this clinical phenotype, OR: Odds ratio
aComparisons were performed with the control group

## Sheet: SuppTable7
Supplementary Table 7. Sequential conditional analysis results with anticentromere positive patients
Gene	Alleles	Meta p-valuea	OR	Conditioned p-value
HLA-DQB1	DQB1*05:01	1.16e-66	1.97	--
HLA-DRB1	DRB1*08:01	9.73e-57	3.18	4e-64
HLA-DRB1	DRB1*07:01	1.17e-63	0.36	1.84e-45
HLA-DQA1	DQA1*03:01	2.01e-13	1.31	1.97e-20
In Boldface the alleles exclusively associated with this serological phenotype, OR: Odds ratio
aComparisons were performed with the control group

## Sheet: SuppTable8
Supplementary Table 8. Sequential conditional analysis results with antitopoisomerase positive patients
Gene	Alleles	Meta p-valuea	OR	Conditioned p-value
HLA-DPB1	DPB1*1301	2.24e-138	6.81	--
HLA-DRB1	DRB1*1104	3.25e-135	4.92	4.57e-127
HLA-DRB1	DRB1*1501	1.76e-15	1.53	3.37e-22
HLA-DPA1	DPA1*0201	7.91e-43	1.87	2.93e-19
HLA-DQB1	DQB1*0301	7.11e-47	1.86	7e-19
HLA-DQB1	DQB1*0303	5.67e-11	1.69	4.85e-09
In Boldface the alleles exclusively associated with this serological phenotype, OR: Odds ratio
aComparisons were performed with the control group

## Sheet: SuppTable9
Supplementary Table 9. Sequential conditional analysis results with anti-RNApolIII positive patients
Gene	Alleles	Meta p-valuea	OR	Conditioned p-value
HLA-DRB1	DRB1*11:04	1.72e-16	2.64	--
AA_DRB1_58_32659974_A	5.28e-15	2.05	--	SSc, ATA
rs1059584 (SNP_DRB1_32659974_G)	5.28e-15	2.05	--	ATA
OR: Odds ratio
aComparisons were performed with the control group

## Sheet: SuppTable10
Supplementary Table 10. Association p-values of classical alleles among the different comparisons.
A. Clinical Subtypes
Alleles	Global analysis	lcSSc vs. Controls	dcSSc vs. Controls	dcSSc vs. lcSSca
DQA1*02:01	1.69e-47	5.23e-51	1.15e-07	2.08e-08
DQA1*05:01	5.5e-22	2.06e-07	1.16e-30	1.76e-11
B. Serological Subtypes
Alleles	Global analysis	ACA vs. Controls	ATA vs. Controls	ATA vs. ACAa
DRB1*08:01	3.06e-28	9.73e-57	0.0013	1.42e-10
DRB1*07:01	1.83e-47	1.17e-63	0.027	3.85e-27
DPA1*02:01	3.77e-07	1.38e-05	2.93e-19	1.09e-40
DQB1*03:01	1.72e-14	0.000199	7.11e-47	1.73e-22
In Boldface the significant p-values exclusively associated with this serological phenotype
aSignificant intra-cases comparisons confirm the private association of the classical alleles
